# Supplementary material for: A metric for evaluating biological information in gene sets and its application to identify co-expressed gene clusters in PBMC
Source: PLoS Comput Biol. 2021 Oct 6;17(10):e1009459. doi: 10.1371/journal.pcbi.1009459 (PMC8523066; doi:10.1371/journal.pcbi.1009459)
Supplement: S8 Table — The whole-blood TB signature from Berry et. al. [21]. (CSV) [file pcbi.1009459.s014.csv]

ENSEMBL_ID	NAME	PROBE	DUPLICATE_GENE
ENSG00000160179.18	ABCG1	ILMN_2329927	FALSE
ENSG00000248487.8	ABHD14A	ILMN_1794213	FALSE
ENSG00000099204.18	ABLIM1	ILMN_1785424	FALSE
ENSG00000123130.16	ACOT9	ILMN_1658995	FALSE
ENSG00000107796.13	ACTA2	ILMN_1671703	FALSE
ENSG00000148926.9	ADM	ILMN_1708934	FALSE
ENSG00000172493.20	AFF1	ILMN_1673119	FALSE
ENSG00000116771.5	AGMAT	ILMN_1707169	FALSE
ENSG00000160216.18	AGPAT3	ILMN_1654010	FALSE
ENSG00000163568.14	AIM2	ILMN_1681301	FALSE
ENSG00000165092.12	ALDH1A1	ILMN_2096372	FALSE
ENSG00000152766.5	ANKRD22	ILMN_1799848	FALSE
ENSG00000152766.5	ANKRD22	ILMN_2132599	TRUE
ENSG00000100342.20	APOL1	ILMN_1688631	FALSE
ENSG00000128335.13	APOL2	ILMN_2325337	FALSE
ENSG00000221963.5	APOL6	ILMN_1687201	FALSE
ENSG00000161944.16	ASGR2	ILMN_1694966	FALSE
ENSG00000161944.16	ASGR2	ILMN_2342638	TRUE
ENSG00000128203.6	ASPHD2	ILMN_2167426	FALSE
ENSG00000162772.16	ATF3	ILMN_2374865	FALSE
ENSG00000171130.17	ATP6V0E2	ILMN_1785095	FALSE
ENSG00000143515.16	ATP8B2	ILMN_1782057	FALSE
ENSG00000177191.2	B3GNT8	ILMN_1741389	FALSE
ENSG00000168062.9	BATF2	ILMN_1690241	FALSE
ENSG00000124243.17	BCAS4	ILMN_2325506	FALSE
ENSG00000113916.17	BCL6	ILMN_1746053	FALSE
ENSG00000136717.14	BIN1	ILMN_1674160	FALSE
ENSG00000136573.12	BLK	ILMN_1668277	FALSE
ENSG00000160469.16	BRSK1	ILMN_2185845	FALSE
ENSG00000137720.7	C11orf1	ILMN_2128967	FALSE
ENSG00000111678.10	C12orf57	ILMN_1812191	FALSE
ENSG00000173369.15	C1QB	ILMN_1796409	FALSE
ENSG00000106804.7	C5	ILMN_1746819	FALSE
ENSG00000183784.6	C9orf66	ILMN_1717248	FALSE
ENSG00000147894.14	C9orf72	ILMN_1762508	FALSE
ENSG00000100346.17	CACNA1I	ILMN_2300664	FALSE
ENSG00000182472.8	CAPN12	ILMN_1787514	FALSE
ENSG00000196954.13	CASP4	ILMN_1778059	FALSE
ENSG00000137757.10	CASP5	ILMN_1722158	FALSE
ENSG00000112486.15	CCR6	ILMN_1690907	FALSE
ENSG00000177697.17	CD151	ILMN_1661589	FALSE
ENSG00000139193.3	CD27	ILMN_1688959	FALSE
ENSG00000120217.13	CD274	ILMN_1701914	FALSE
ENSG00000178562.17	CD28	ILMN_1749362	FALSE
ENSG00000004468.12	CD38	ILMN_2233783	FALSE
ENSG00000167286.9	CD3D	ILMN_2325837	FALSE
ENSG00000102245.7	CD40LG	ILMN_1659077	FALSE
ENSG00000110448.10	CD5	ILMN_1753112	FALSE
ENSG00000085063.14	CD59	ILMN_1724789	FALSE
ENSG00000176749.8	CDK5R1	ILMN_1730928	FALSE
ENSG00000136861.17	CDK5RAP2	ILMN_2415529	FALSE
ENSG00000136861.17	CDK5RAP2	ILMN_1655990	TRUE
ENSG00000079385.21	CEACAM1	ILMN_2371724	FALSE
ENSG00000079385.21	CEACAM1	ILMN_1716815	TRUE
ENSG00000079385.21	CEACAM1	ILMN_1664330	TRUE
ENSG00000086065.13	CHMP5	ILMN_2094166	FALSE
ENSG00000172322.13	CLEC12A	ILMN_2403228	FALSE
ENSG00000172322.13	CLEC12A	ILMN_2292178	TRUE
ENSG00000172322.13	CLEC12A	ILMN_1663142	TRUE
ENSG00000166527.7	CLEC4D	ILMN_1808979	FALSE
ENSG00000103351.12	CLUAP1	ILMN_1750596	FALSE
ENSG00000125246.15	CLYBL	ILMN_1663538	FALSE
ENSG00000134326.11	CMPK2	ILMN_1783621	FALSE
ENSG00000203710.10	CR1	ILMN_2388112	FALSE
ENSG00000203710.10	CR1	ILMN_1742601	TRUE
ENSG00000146592.16	CREB5	ILMN_1731714	FALSE
ENSG00000146592.16	CREB5	ILMN_1728677	TRUE
ENSG00000169245.5	CXCL10	ILMN_1791759	FALSE
ENSG00000107201.9	DDX58	ILMN_1797001	FALSE
ENSG00000137628.16	DDX60	ILMN_1795181	FALSE
ENSG00000102796.10	DHRS12	ILMN_1669177	FALSE
ENSG00000102796.10	DHRS12	ILMN_1719915	TRUE
ENSG00000073737.16	DHRS9	ILMN_1727150	FALSE
ENSG00000073737.16	DHRS9	ILMN_2281502	TRUE
ENSG00000073737.16	DHRS9	ILMN_1733998	TRUE
ENSG00000073737.16	DHRS9	ILMN_2384181	TRUE
ENSG00000088387.18	DOCK9	ILMN_1773413	FALSE
ENSG00000163840.9	DTX3L	ILMN_1784380	FALSE
ENSG00000108861.8	DUSP3	ILMN_1797522	FALSE
ENSG00000146425.10	DYNLT1	ILMN_1678766	FALSE
ENSG00000135636.13	DYSF	ILMN_1810420	FALSE
ENSG00000138185.19	ENTPD1	ILMN_1773125	FALSE
ENSG00000082397.17	EPB41L3	ILMN_2109197	FALSE
ENSG00000116106.11	EPHA4	ILMN_1672022	FALSE
ENSG00000133106.14	EPSTI1	ILMN_2388547	FALSE
ENSG00000134954.14	ETS1	ILMN_2122103	FALSE
ENSG00000010030.13	ETV7	ILMN_1700671	FALSE
ENSG00000126860.11	EVI2A	ILMN_1662747	FALSE
ENSG00000167106.11	FAM102A	ILMN_2401779	FALSE
ENSG00000167106.11	FAM102A	ILMN_1745112	TRUE
ENSG00000188820.12	FAM26F	ILMN_2066849	FALSE
ENSG00000116663.10	FBXO6	ILMN_1701455	FALSE
ENSG00000186431.18	FCAR	ILMN_2365091	FALSE
ENSG00000158869.10	FCER1G	ILMN_2123743	FALSE
ENSG00000275395.5	FCGBP	ILMN_2302757	FALSE
ENSG00000150337.13	FCGR1A	ILMN_2176063	FALSE
ENSG00000198019.12	FCGR1B	ILMN_2391051	FALSE
ENSG00000198019.12	FCGR1B	ILMN_2261600	TRUE
ENSG00000132185.16	FCRLA	ILMN_1691071	FALSE
ENSG00000126262.4	FFAR2	ILMN_1797895	FALSE
ENSG00000119686.9	FLVCR2	ILMN_2204876	FALSE
ENSG00000172159.15	FRMD3	ILMN_1698725	FALSE
ENSG00000099860.8	GADD45B	ILMN_1718977	FALSE
ENSG00000130222.10	GADD45G	ILMN_1651498	FALSE
ENSG00000183087.14	GAS6	ILMN_1779558	FALSE
ENSG00000183087.14	GAS6	ILMN_1784749	TRUE
ENSG00000117228.9	GBP1	ILMN_1701114	FALSE
ENSG00000117228.9	GBP1	ILMN_2148785	TRUE
ENSG00000162645.12	GBP2	ILMN_1774077	FALSE
ENSG00000162654.8	GBP4	ILMN_1771385	FALSE
ENSG00000154451.14	GBP5	ILMN_2114568	FALSE
ENSG00000183347.14	GBP6	ILMN_2121568	FALSE
ENSG00000183347.14	GBP6	ILMN_1756953	TRUE
ENSG00000131979.18	GCH1	ILMN_2335813	FALSE
ENSG00000131979.18	GCH1	ILMN_1812759	TRUE
ENSG00000198814.12	GK	ILMN_1725471	FALSE
ENSG00000198814.12	GK	ILMN_2393296	TRUE
ENSG00000187037.8	GPR141	ILMN_2092333	FALSE
ENSG00000139572.3	GPR84	ILMN_1785345	FALSE
ENSG00000154016.13	GRAP	ILMN_2264011	FALSE
ENSG00000163754.17	GYG1	ILMN_2230862	FALSE
ENSG00000113088.5	GZMK	ILMN_1710734	FALSE
ENSG00000138646.8	HERC5	ILMN_1729749	FALSE
ENSG00000184260.5	HIST2H2AC	ILMN_1768973	FALSE
ENSG00000203814.6	HIST2H2BF	ILMN_1670093	FALSE
ENSG00000159399.9	HK2	ILMN_1723486	FALSE
ENSG00000223865.10	HLA-DPB1	ILMN_1749070	FALSE
ENSG00000173083.14	HPSE	ILMN_2092850	FALSE
ENSG00000173083.14	HPSE	ILMN_1779547	TRUE
ENSG00000117318.8	ID3	ILMN_1732296	FALSE
ENSG00000163565.18	IFI16	ILMN_1710937	FALSE
ENSG00000068079.7	IFI35	ILMN_1745374	FALSE
ENSG00000137965.10	IFI44	ILMN_1760062	FALSE
ENSG00000137959.15	IFI44L	ILMN_1723912	FALSE
ENSG00000126709.14	IFI6	ILMN_2347798	FALSE
ENSG00000115267.5	IFIH1	ILMN_1781373	FALSE
ENSG00000119922.9	IFIT2	ILMN_1739428	FALSE
ENSG00000119917.13	IFIT3	ILMN_1701789	FALSE
ENSG00000119917.13	IFIT3	ILMN_2239754	TRUE
ENSG00000119917.13	IFIT3	ILMN_1664543	TRUE
ENSG00000152778.8	IFIT5	ILMN_1696654	FALSE
ENSG00000185885.15	IFITM1	ILMN_1801246	FALSE
ENSG00000142089.15	IFITM3	ILMN_1805750	FALSE
ENSG00000161405.16	IKZF3	ILMN_2300695	FALSE
ENSG00000164136.16	IL15	ILMN_2369221	FALSE
ENSG00000164136.16	IL15	ILMN_1724181	TRUE
ENSG00000115607.9	IL18RAP	ILMN_1721762	FALSE
ENSG00000136689.18	IL1RN	ILMN_1689734	FALSE
ENSG00000168685.14	IL7R	ILMN_1691341	FALSE
ENSG00000168685.14	IL7R	ILMN_2342579	TRUE
ENSG00000185507.19	IRF7	ILMN_1798181	FALSE
ENSG00000187608.8	ISG15	ILMN_2054019	FALSE
ENSG00000096968.13	JAK2	ILMN_1683178	FALSE
ENSG00000157551.17	KCNJ15	ILMN_1659770	FALSE
ENSG00000157551.17	KCNJ15	ILMN_2396903	TRUE
ENSG00000157551.17	KCNJ15	ILMN_1675756	TRUE
ENSG00000054523.17	KIF1B	ILMN_1743034	FALSE
ENSG00000118922.17	KLF12	ILMN_1762801	FALSE
ENSG00000118922.17	KLF12	ILMN_1714444	TRUE
ENSG00000118922.17	KLF12	ILMN_1797375	TRUE
ENSG00000183762.12	KREMEN1	ILMN_1772697	FALSE
ENSG00000183762.12	KREMEN1	ILMN_1700994	TRUE
ENSG00000170486.10	KRT72	ILMN_1695812	FALSE
ENSG00000103642.11	LACTB	ILMN_1693830	FALSE
ENSG00000002549.12	LAP3	ILMN_1683792	FALSE
ENSG00000213626.11	LBH	ILMN_1660794	FALSE
ENSG00000213626.11	LBH	ILMN_1811507	TRUE
ENSG00000213626.11	LBH	ILMN_2315979	TRUE
ENSG00000145685.13	LHFPL2	ILMN_1747744	FALSE
ENSG00000187116.13	LILRA5	ILMN_1726545	FALSE
ENSG00000187116.13	LILRA5	ILMN_2357419	TRUE
ENSG00000186818.12	LILRB4	ILMN_2355953	FALSE
ENSG00000182541.17	LIMK2	ILMN_1687960	FALSE
ENSG00000182541.17	LIMK2	ILMN_1660624	TRUE
ENSG00000182541.17	LIMK2	ILMN_2270443	TRUE
ENSG00000182541.17	LIMK2	ILMN_2367671	TRUE
ENSG00000111052.7	LIN7A	ILMN_1806293	FALSE
ENSG00000113368.11	LMNB1	ILMN_2126706	FALSE
ENSG00000087253.12	LPCAT2	ILMN_1796335	FALSE
ENSG00000126243.8	LRFN3	ILMN_2103919	FALSE
ENSG00000213903.8	LTB4R	ILMN_1747251	FALSE
ENSG00000204103.3	MAFB	ILMN_1764709	FALSE
ENSG00000198934.4	MAGEE1	ILMN_2205032	FALSE
ENSG00000112062.10	MAPK14	ILMN_2388090	FALSE
ENSG00000112062.10	MAPK14	ILMN_1737627	TRUE
ENSG00000112062.10	MAPK14	ILMN_1788002	TRUE
ENSG00000116604.17	MEF2D	ILMN_1763228	FALSE
ENSG00000100985.7	MMP9	ILMN_1796316	FALSE
ENSG00000133422.12	MORC2	ILMN_2103591	FALSE
ENSG00000065911.11	MTHFD2	ILMN_2405521	FALSE
ENSG00000136997.17	MYC	ILMN_2110908	FALSE
ENSG00000249437.7	NAIP	ILMN_2260082	FALSE
ENSG00000249437.7	NAIP	ILMN_1760189	TRUE
ENSG00000243477.5	NAT6	ILMN_1765001	FALSE
ENSG00000104320.13	NBN	ILMN_1734833	FALSE
ENSG00000165795.23	NDRG2	ILMN_2361603	FALSE
ENSG00000184613.10	NELL2	ILMN_1725417	FALSE
ENSG00000136999.4	NOV	ILMN_1787186	FALSE
ENSG00000151623.14	NR3C2	ILMN_2210934	FALSE
ENSG00000089127.12	OAS1	ILMN_1675640	FALSE
ENSG00000089127.12	OAS1	ILMN_2410826	TRUE
ENSG00000111335.12	OAS2	ILMN_1709333	FALSE
ENSG00000111331.12	OAS3	ILMN_1745397	FALSE
ENSG00000135114.12	OASL	ILMN_1681721	FALSE
ENSG00000135114.12	OASL	ILMN_1674811	TRUE
ENSG00000099985.3	OSM	ILMN_1780546	FALSE
ENSG00000174944.8	P2RY14	ILMN_2342835	FALSE
ENSG00000174944.8	P2RY14	ILMN_2258409	TRUE
ENSG00000178685.13	PARP10	ILMN_1710844	FALSE
ENSG00000173193.13	PARP14	ILMN_1691731	FALSE
ENSG00000138496.16	PARP9	ILMN_2053527	FALSE
ENSG00000138496.16	PARP9	ILMN_1731224	TRUE
ENSG00000115687.13	PASK	ILMN_1754858	FALSE
ENSG00000115687.13	PASK	ILMN_1667022	TRUE
ENSG00000170525.19	PFKFB3	ILMN_2186061	FALSE
ENSG00000008438.4	PGLYRP1	ILMN_1704870	FALSE
ENSG00000116793.15	PHTF1	ILMN_1803464	FALSE
ENSG00000133056.13	PIK3C2B	ILMN_2117323	FALSE
ENSG00000100100.12	PIK3IP1	ILMN_1719986	FALSE
ENSG00000011422.11	PLAUR	ILMN_2408543	FALSE
ENSG00000188313.12	PLSCR1	ILMN_1745242	FALSE
ENSG00000140464.19	PML	ILMN_1728019	FALSE
ENSG00000137054.15	POLR1E	ILMN_1678934	FALSE
ENSG00000057657.15	PRDM1	ILMN_2298159	FALSE
ENSG00000135378.3	PRRG4	ILMN_1661809	FALSE
ENSG00000240065.7	PSMB9	ILMN_2376108	FALSE
ENSG00000092010.14	PSME1	ILMN_1726698	FALSE
ENSG00000100911.15	PSME2	ILMN_1786612	FALSE
ENSG00000152229.18	PSTPIP2	ILMN_1713058	FALSE
ENSG00000213413.2	PVRIG	ILMN_1688279	FALSE
ENSG00000115828.15	QPCT	ILMN_1741727	FALSE
ENSG00000139832.4	RAB20	ILMN_1708881	FALSE
ENSG00000129667.12	RHBDF2	ILMN_1735792	FALSE
ENSG00000129667.12	RHBDF2	ILMN_1691717	TRUE
ENSG00000129667.12	RHBDF2	ILMN_2373062	TRUE
ENSG00000134321.11	RSAD2	ILMN_1657871	FALSE
ENSG00000136514.2	RTP4	ILMN_2173975	FALSE
ENSG00000177409.11	SAMD9L	ILMN_1799467	FALSE
ENSG00000182568.16	SATB1	ILMN_1690646	FALSE
ENSG00000197249.13	SERPINA1	ILMN_2256050	FALSE
ENSG00000149131.15	SERPING1	ILMN_1670305	FALSE
ENSG00000080546.13	SESN1	ILMN_1800626	FALSE
ENSG00000187231.13	SESTD1	ILMN_1724495	FALSE
ENSG00000105501.12	SIGLEC5	ILMN_1740298	FALSE
ENSG00000116991.10	SIPA1L2	ILMN_1732923	FALSE
ENSG00000089012.14	SIRPG	ILMN_2383058	FALSE
ENSG00000197208.5	SLC22A4	ILMN_1685057	FALSE
ENSG00000112053.13	SLC26A8	ILMN_1672575	FALSE
ENSG00000112053.13	SLC26A8	ILMN_1656849	TRUE
ENSG00000112053.13	SLC26A8	ILMN_2394210	TRUE
ENSG00000112053.13	SLC26A8	ILMN_1755843	TRUE
ENSG00000170385.9	SLC30A1	ILMN_2067852	FALSE
ENSG00000082014.16	SMARCD3	ILMN_2309180	FALSE
ENSG00000185338.4	SOCS1	ILMN_1774733	FALSE
ENSG00000184557.4	SOCS3	ILMN_1781001	FALSE
ENSG00000112096.16	SOD2	ILMN_2406501	FALSE
ENSG00000134243.11	SORT1	ILMN_1707077	FALSE
ENSG00000005513.9	SOX8	ILMN_1789244	FALSE
ENSG00000079263.18	SP140	ILMN_2246882	FALSE
ENSG00000107742.12	SPOCK2	ILMN_1656287	FALSE
ENSG00000068784.12	SRBD1	ILMN_1798827	FALSE
ENSG00000096063.15	SRPK1	ILMN_1798804	FALSE
ENSG00000115415.18	STAT1	ILMN_1690105	FALSE
ENSG00000115415.18	STAT1	ILMN_1777325	TRUE
ENSG00000115415.18	STAT1	ILMN_1691364	TRUE
ENSG00000170581.13	STAT2	ILMN_1690921	FALSE
ENSG00000148175.12	STOM	ILMN_1696419	FALSE
ENSG00000135604.9	STX11	ILMN_1720771	FALSE
ENSG00000198829.6	SUCNR1	ILMN_1681601	FALSE
ENSG00000168394.10	TAP1	ILMN_1751079	FALSE
ENSG00000204267.13	TAP2	ILMN_1777565	FALSE
ENSG00000204267.13	TAP2	ILMN_1759250	TRUE
ENSG00000081059.19	TCF7	ILMN_2367141	FALSE
ENSG00000185339.8	TCN2	ILMN_1740572	FALSE
ENSG00000145365.10	TIFA	ILMN_1686454	FALSE
ENSG00000134809.8	TIMM10	ILMN_1765332	FALSE
ENSG00000137462.6	TLR2	ILMN_1772387	FALSE
ENSG00000187554.11	TLR5	ILMN_1722981	FALSE
ENSG00000171729.13	TMEM51	ILMN_1674985	FALSE
ENSG00000123610.4	TNFAIP6	ILMN_1785732	FALSE
ENSG00000215788.9	TNFRSF25	ILMN_2299661	FALSE
ENSG00000215788.9	TNFRSF25	ILMN_1765109	TRUE
ENSG00000121858.10	TNFSF10	ILMN_1801307	FALSE
ENSG00000102524.11	TNFSF13B	ILMN_1758418	FALSE
ENSG00000076554.15	TPD52	ILMN_2381064	FALSE
ENSG00000198467.13	TPM2	ILMN_1789196	FALSE
ENSG00000135148.11	TRAFD1	ILMN_1758250	FALSE
ENSG00000071575.11	TRIB2	ILMN_1714700	FALSE
ENSG00000132274.15	TRIM22	ILMN_1779252	FALSE
ENSG00000132256.18	TRIM5	ILMN_1737599	FALSE
ENSG00000132256.18	TRIM5	ILMN_2404665	TRUE
ENSG00000182463.15	TSHZ2	ILMN_1655611	FALSE
ENSG00000117862.11	TXNDC12	ILMN_1783753	FALSE
ENSG00000156587.15	UBE2L6	ILMN_1769520	FALSE
ENSG00000156587.15	UBE2L6	ILMN_1703108	TRUE
ENSG00000168899.4	VAMP5	ILMN_1809467	FALSE
ENSG00000140105.17	WARS	ILMN_2337655	FALSE
ENSG00000140105.17	WARS	ILMN_1727271	TRUE
ENSG00000085449.14	WDFY1	ILMN_1676448	FALSE
ENSG00000163625.15	WDFY3	ILMN_1697493	FALSE
ENSG00000132530.16	XAF1	ILMN_2370573	FALSE
ENSG00000132530.16	XAF1	ILMN_1742618	TRUE
ENSG00000114127.10	XRN1	ILMN_2384216	FALSE
ENSG00000124256.14	ZBP1	ILMN_1765994	FALSE
ENSG00000163958.13	ZDHHC19	ILMN_1766896	FALSE
ENSG00000197013.9	ZNF429	ILMN_1695413	FALSE
ENSG00000183621.15	ZNF438	ILMN_1678494	FALSE
ENSG00000203326.11	ZNF525	ILMN_1748432	FALSE
